# Supplementary material for: Effect of initial Si/Al ratios on the performance of low crystallinity Hβ-x zeolite supported NiMo carbide catalysts for aromatics hydrogenation
Source: Royal Society of Chemistry journal article supplement (doi:10.1039/c9cy00885c), 2019-01-01
Supplement: c9cy00885c1.pdf [file c9cy00885c1.pdf]

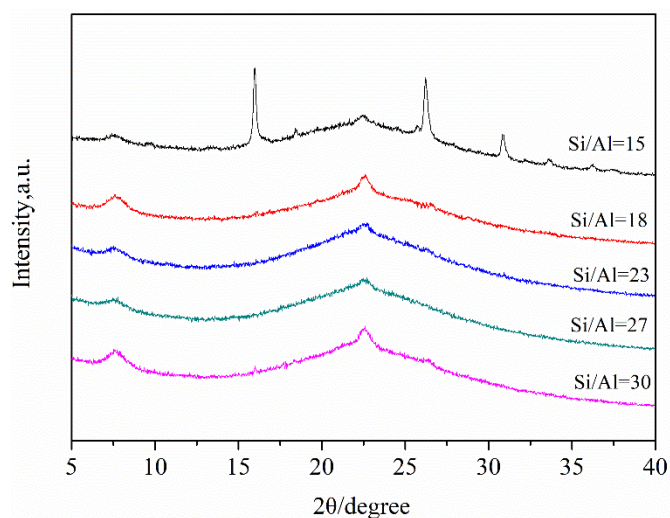

Fig. S1. XRD patterns of Hβ-x zeolites with different Si/Al ratios

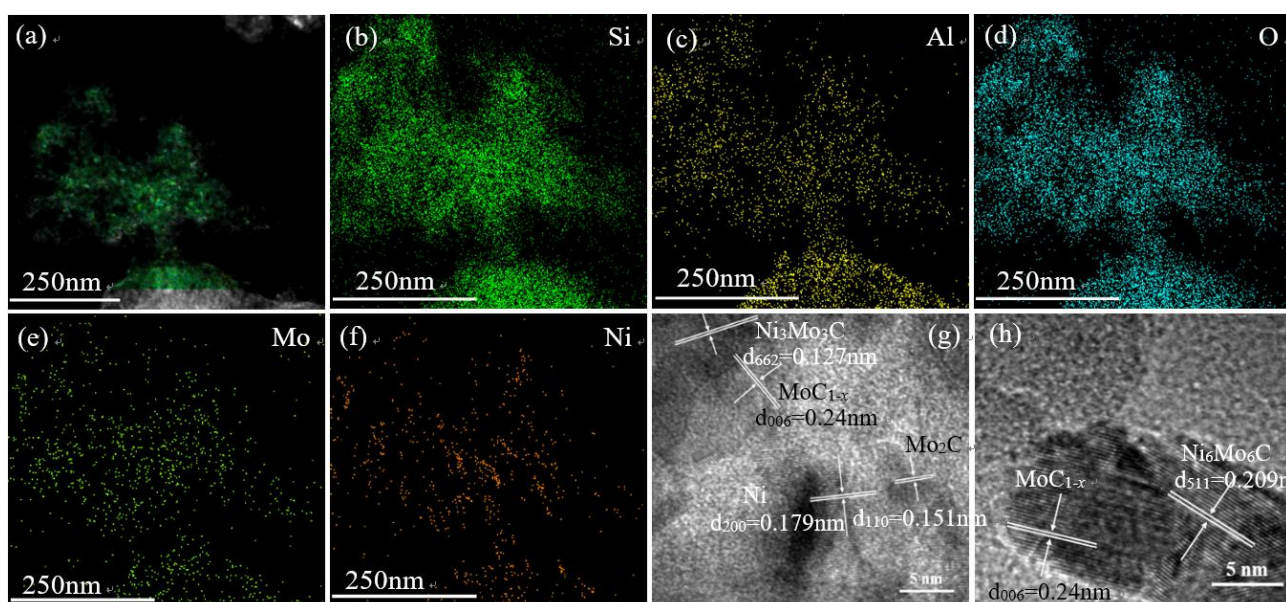

Fig. S2 The HRTEM images and the EDX elemental mapping analysis of NiMoC/Hβ-27 catalyst

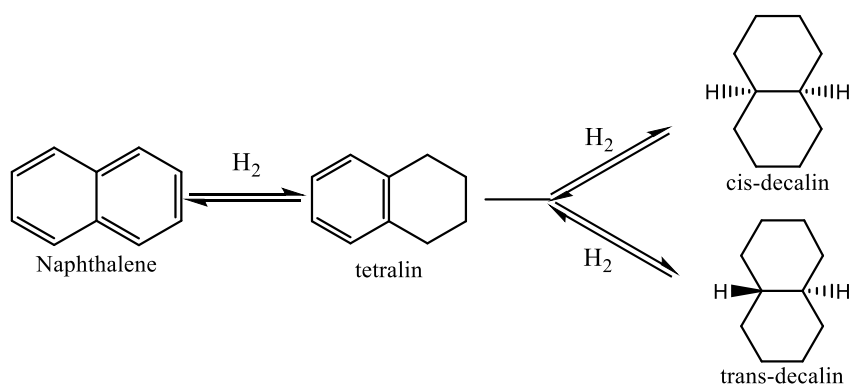

Fig. S3. The reaction path of naphthalene hydrogenation over NiMoC/Hβ-x catalysts

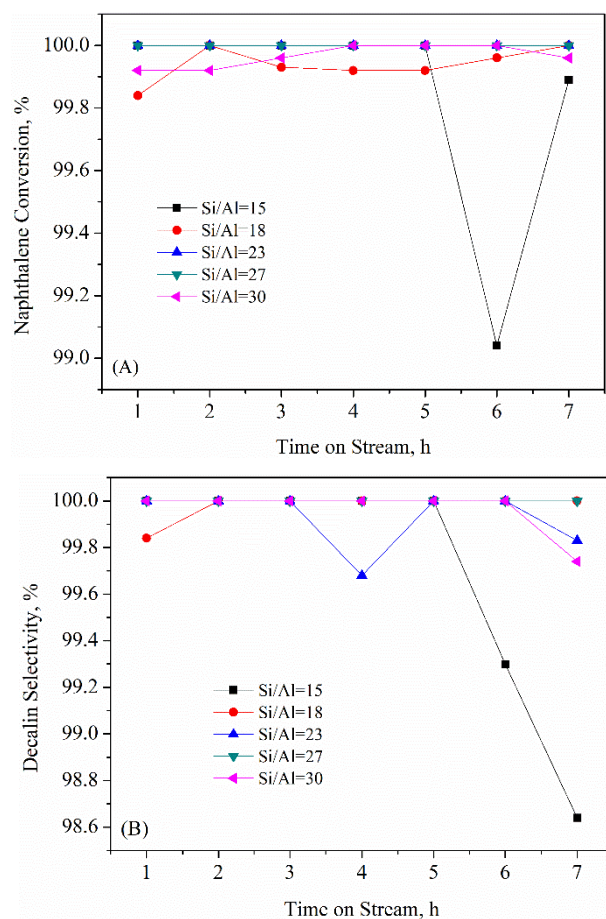

Fig. S4 Conversion of naphthalene (A) and decalin selectivity (B) over different catalysts at different reaction times. Feedstock was 5% naphthalene diluted in n-heptane. The reaction was performed at 225°C, LHSV = 2 h<sup>-1</sup>, P(H<sub>2</sub>) = 3MPa, ratio (H<sub>2</sub>/Oil) = 600, and hydrogenated product was collected every hour.

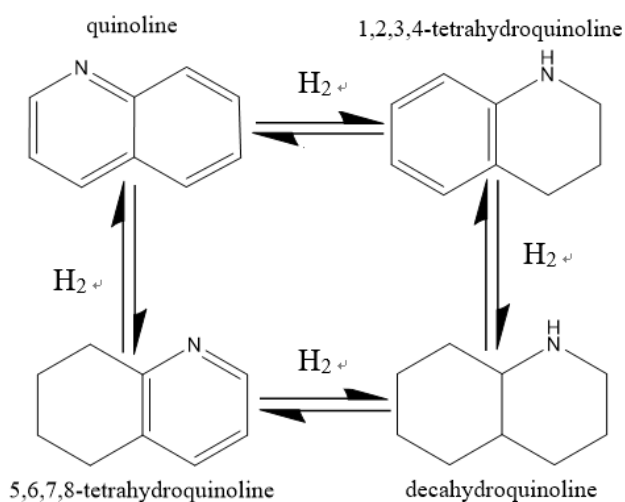

Fig. S5 The reaction network of quinoline hydrogenation in the presence of 5% naphthalene

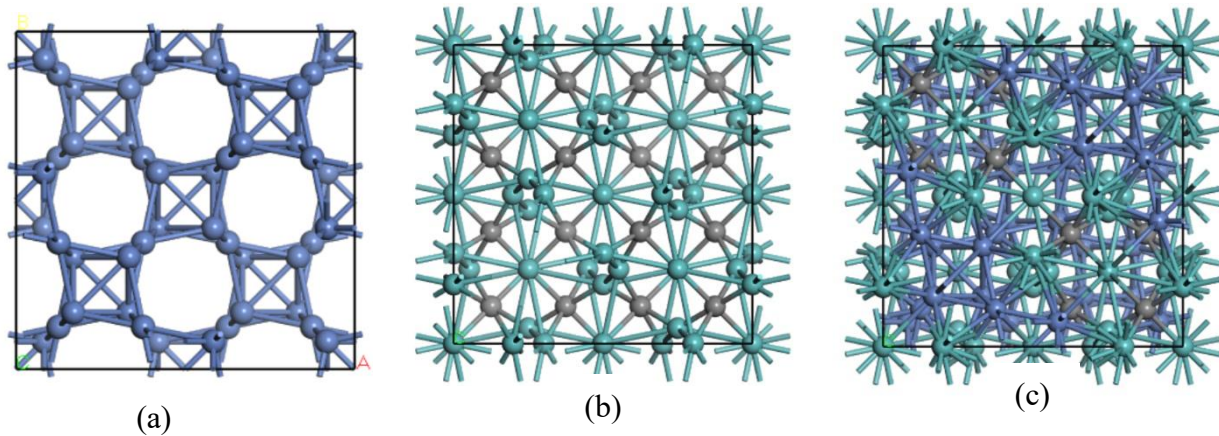

Fig. S6 The crystal structure of  $\text{Ni}_3\text{Mo}_3\text{C}$  phase. (a) a portion of the Ni substructure of the  $\text{Ni}_3\text{Mo}_3\text{C}$ . (b) a portion of the Mo,C substructure of the  $\text{Ni}_3\text{Mo}_3\text{C}$ . (c) the structure of the Ni, Mo and C substructures combined.

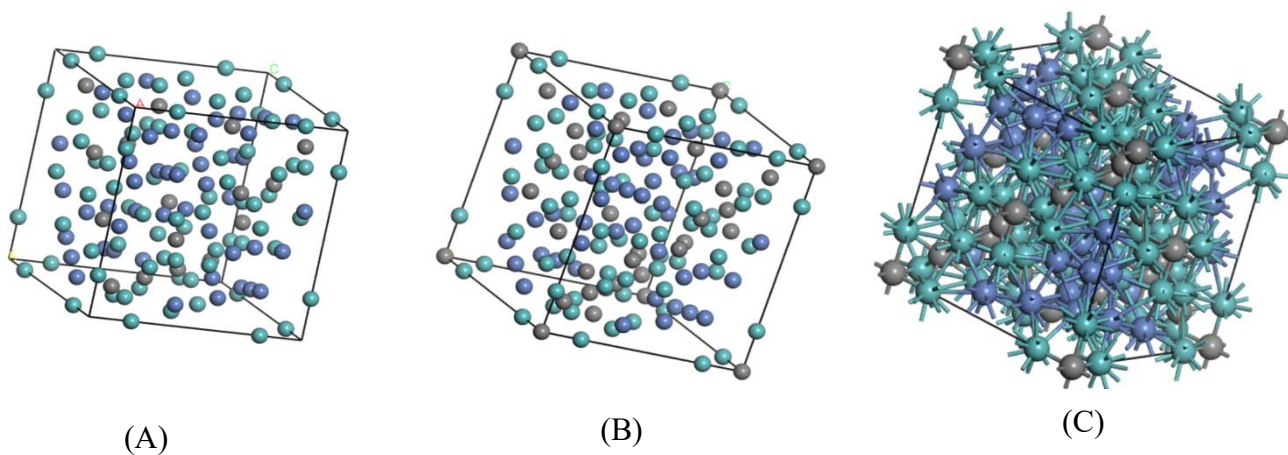

Fig. S7 The structure of the  $\text{Ni}_3\text{Mo}_3\text{C}$  phase (A) and  $\text{Ni}_6\text{Mo}_6\text{C}$  phase (B), (C).
